# Supplementary material for: The unusual visible photothermal response of free standing multilayered films based on plasmonic bimetallic nanocages
Source: Royal Society of Chemistry journal article supplement (doi:10.1039/c5ra00682a), 2015-01-01
Supplement: c5ra00682a1.pdf [file c5ra00682a1.pdf]

**The Unusual Visible Photothermal Response of Free Standing Multilayered Films Based on Plasmonic Bimetallic Nanocages**

Milana Lisunova,<sup>1,†</sup> Jeremy R. Dunklin,<sup>2</sup> Samir V. Jenkins,<sup>3</sup> Jingyi Chen,<sup>3,††</sup> D. Keith Roper<sup>1,2,†††</sup>

<sup>1</sup>Ralph E. Martin Department of Chemical Engineering, 3202 Bell Engineering Center,

<sup>2</sup>MicroElectronics-Photonics Program, Institute for Nanoscience and Engineering,

<sup>3</sup>Chemistry and Biochemistry,

University of Arkansas, Fayetteville, AR 72701

[†] To whom correspondence should be addressed.

Tel: +1 770 256 8426

Fax: +1 479 575 7926

e-mail: [lisunova@uark.edu](mailto:lisunova@uark.edu)

[††] To whom correspondence should be addressed.

Tel: +1 479-575-6203

Fax: +1 479-575-4049

e-mail: [chenj@uark.edu](mailto:chenj@uark.edu)

[†††] To whom correspondence should be addressed.

Tel: +1 479 575 6691

Fax: +1 479 575 7926

e-mail: [dkroper@uark.edu](mailto:dkroper@uark.edu)

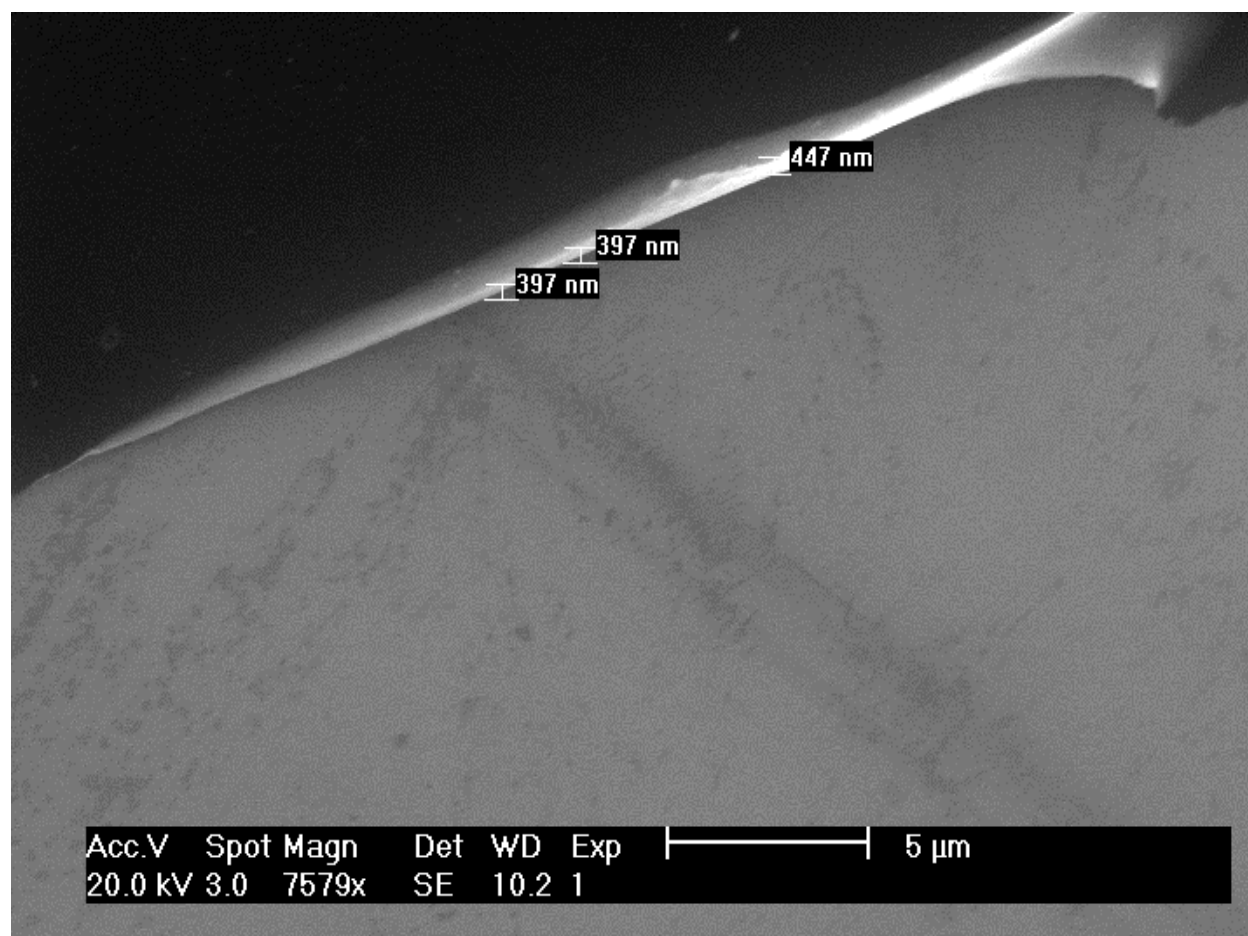

Figure S1. SEM image of the 1 bilayer of the PVA/PVPON\_Ag@AuNCs produced of 2mg/ml PVA and 2mg/ml of PVPON with 250fM of Ag@AuNCs

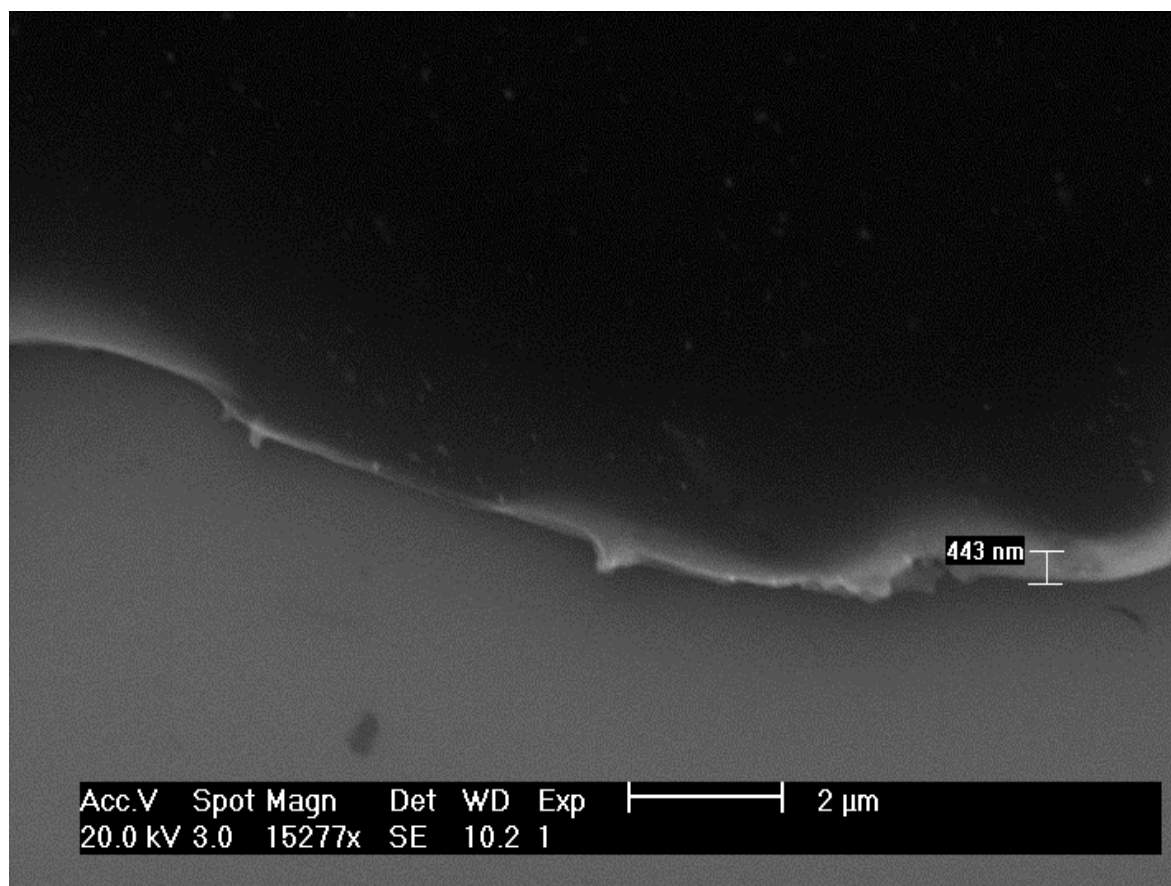

Figure S2. SEM image of the 1 bilayer of the PVA/PVPON\_Ag@AuNCs produced of 2mg/ml PVA and 2mg/mlPVPON with 1250fM of Ag@AuNCs

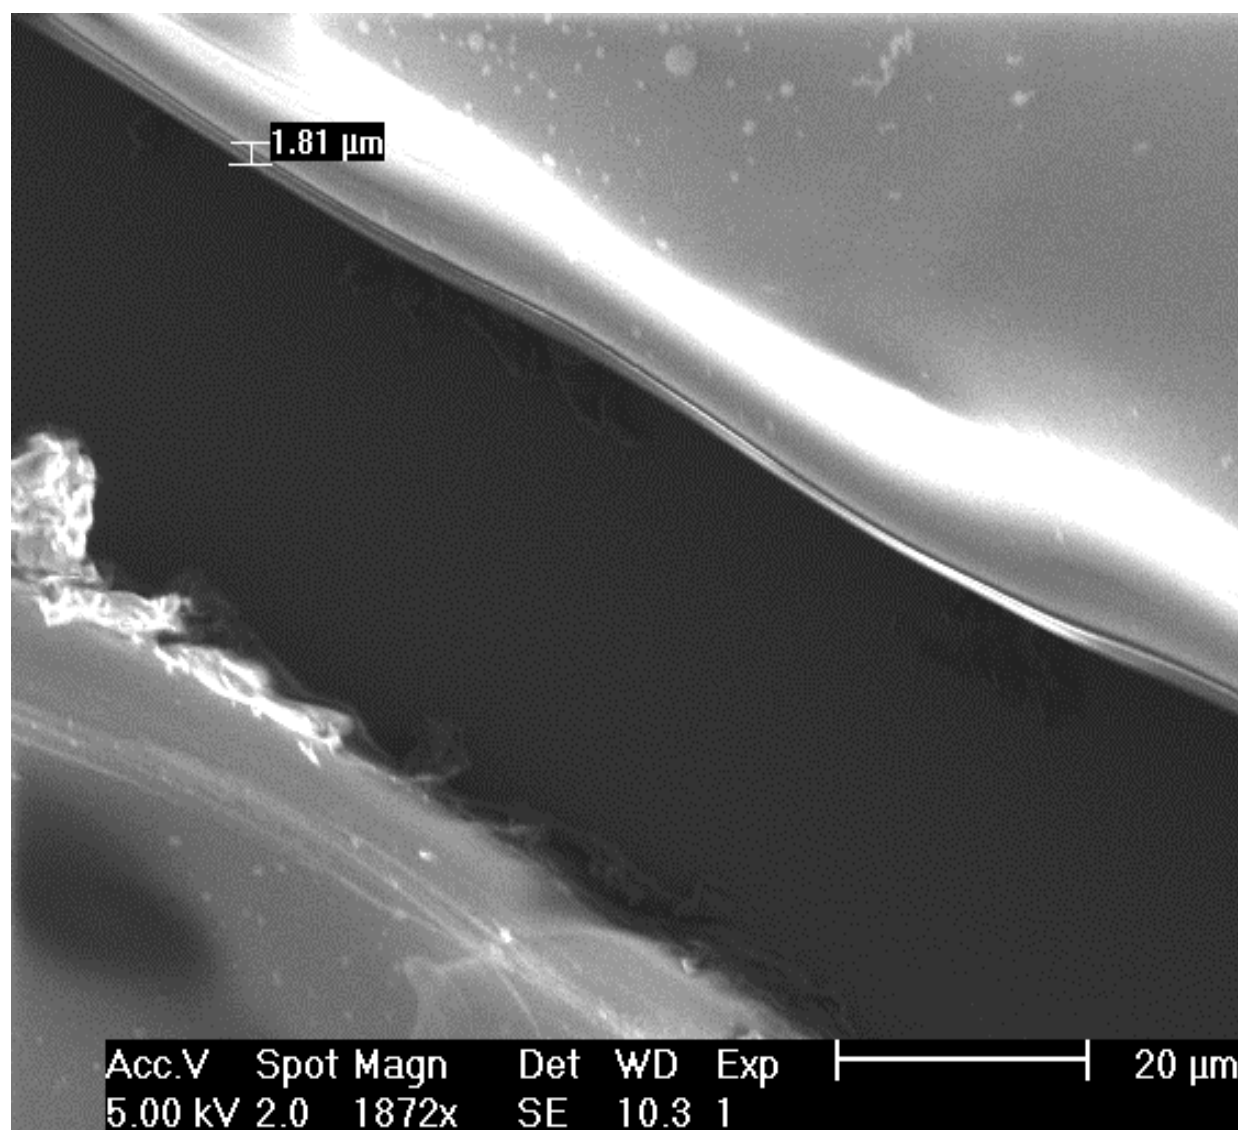

Figure S3. SEM image of the 1 bilayer of the PVA/PVPON\_Ag@AuNCs produced of 20mg/ml of PVA and 2mg/ml of PVPON with 1250fM of Ag@AuNCs

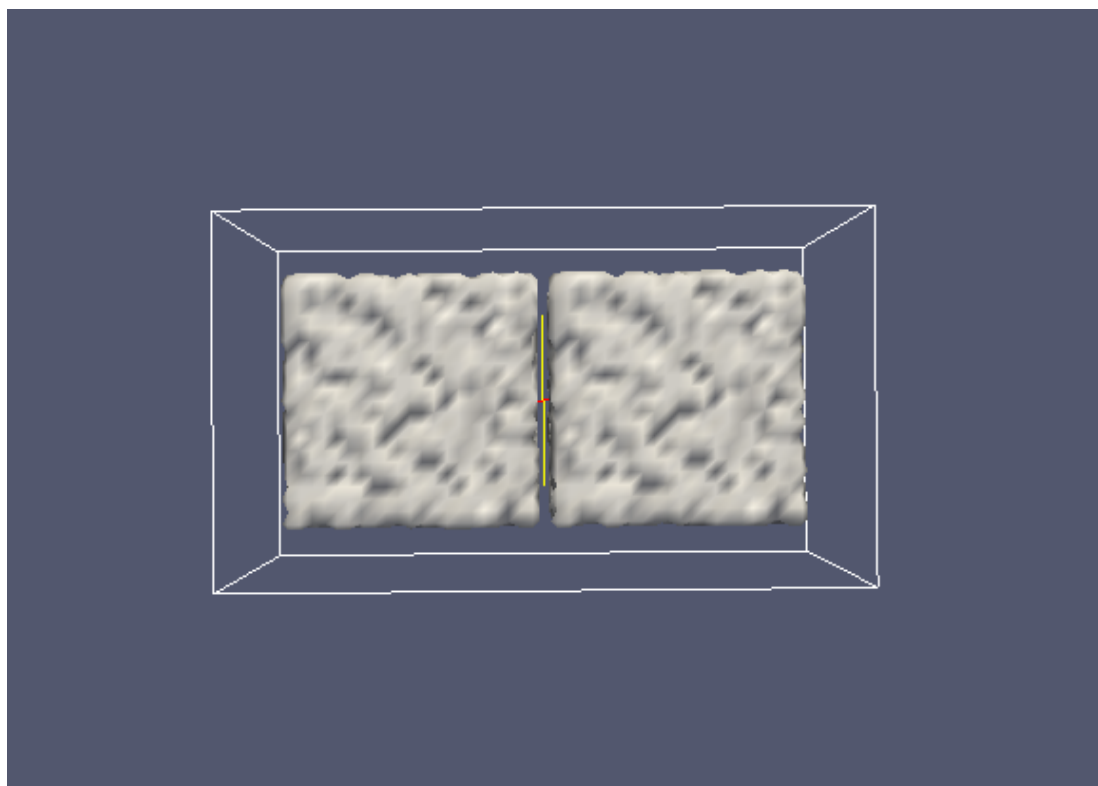

or

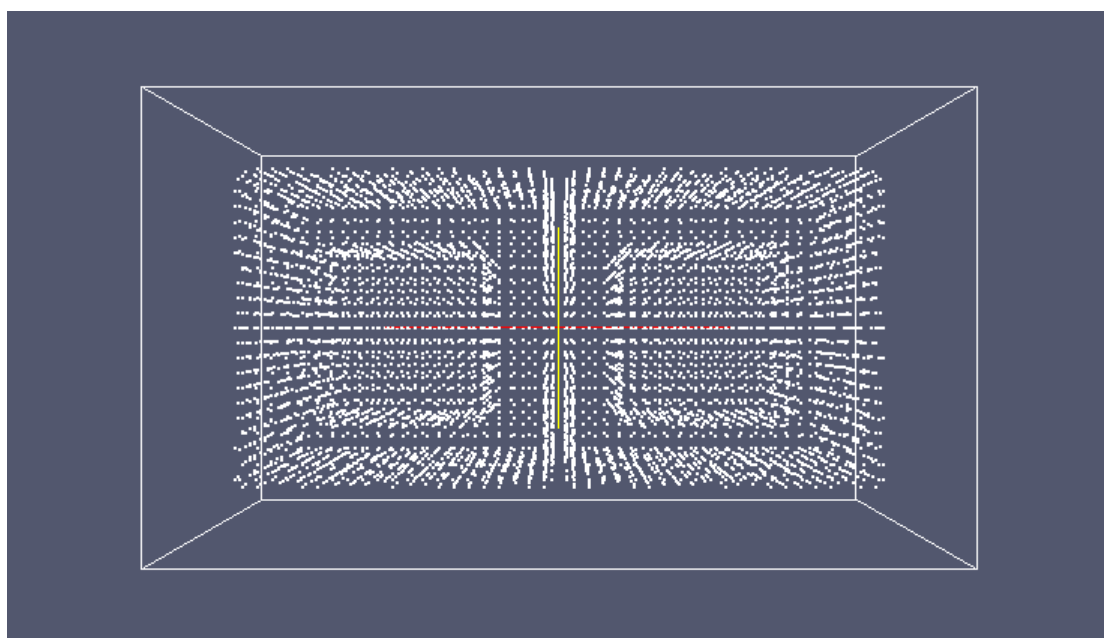

Figure S4. An example of the shape file of the dimers Ag@AuNCs in a regime of the close proximity (of about 2 nm).
